# Supplementary material for: Changes in pregnancy-related serum biomarkers early in gestation are associated with later development of preeclampsia
Source: PubMed Central journal article supplement (PMC7053753; doi:10.1371/journal.pone.0230000), 2020-03-03

S1 Fig.

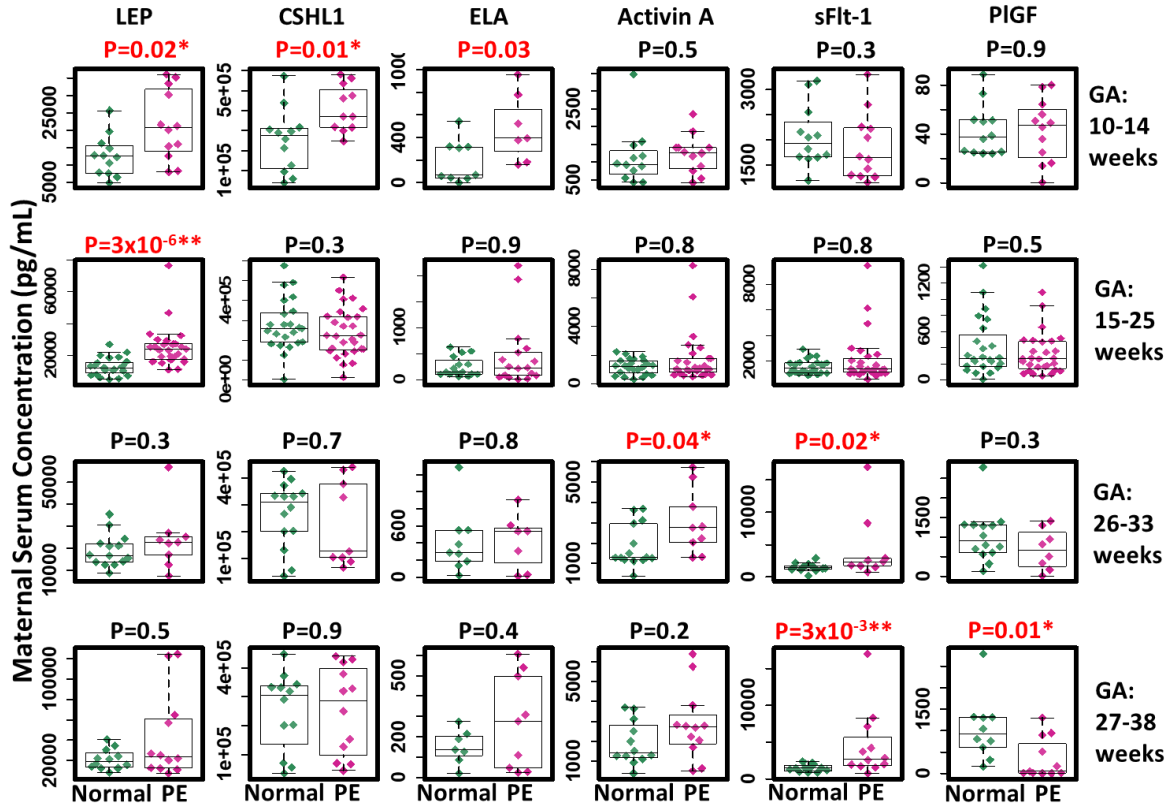

Supplement: pone.0230000.s001.pdf [file pone.0230000.s001.pdf]
