# Supplementary material for: Changes in pregnancy-related serum biomarkers early in gestation are associated with later development of preeclampsia
Source: PubMed Central journal article supplement (PMC7053753; doi:10.1371/journal.pone.0230000), 2020-03-03
Supplement: pone.0230000.s003.pdf [file pone.0230000.s003.pdf]

### S1 Text.

A 10-fold cross-validated elastic net (EN) algorithm was used for multivariate modeling of the ELISA data. The model searches for an optimum  $\beta$  to minimize the least squared loss function with EN penalty:

$$L(\lambda, \beta) = |y - X\beta|^2 + \lambda \left[ \frac{(1-\alpha)|\beta|^2}{2} + \alpha|\beta| \right] \quad (1)$$

where  $X=(x_1, \dots, x_6)$  is a matrix of 6 analytes, with  $x_j=(x_{1j}, \dots, x_{nj})^T$ , where  $j=1, \dots, 6$ .  $y = (y_1, \dots, y_n)^T$  is the response (i.e., current GA).  $n$  is the number of samples in the training cohort.  $|y - X\beta|^2$  is the squared loss function.  $\lambda \left[ \frac{(1-\alpha)|\beta|^2}{2} + \alpha|\beta| \right]$  is the well-known EN penalty used for controlling the model complexity. The parameters of each penalty were controlled by  $\alpha$  and  $\lambda$ .  $\alpha$  was set to 1 and  $\lambda$  was set to 0.208, which maximizes the predictive value of model measured by  $R^2$  in the cross-validation (see Figure below). The model is thus reduced to a lasso-regularized regression.

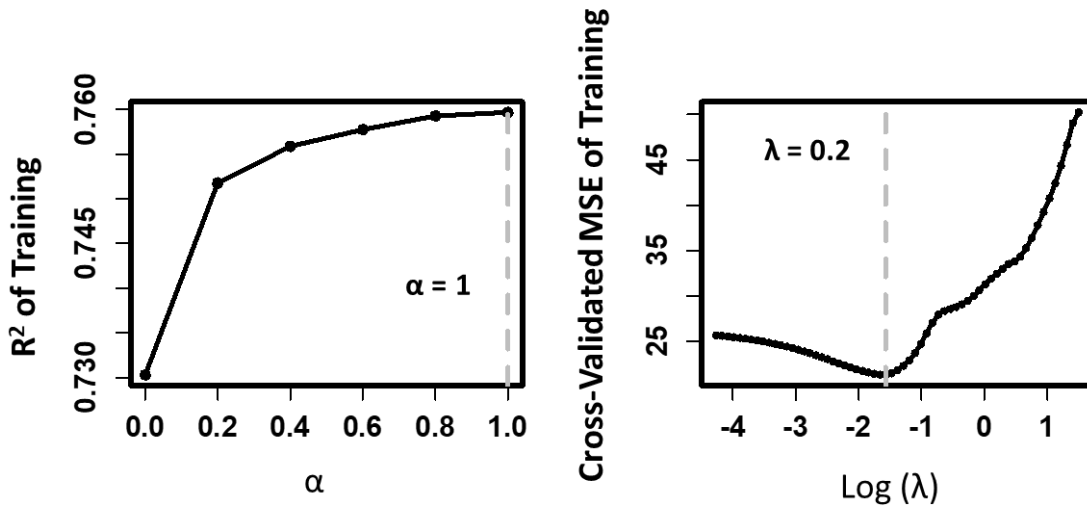

Figure. Performance of EN model with respect to  $\alpha$  and  $\lambda$  in our training cohort. Left:  $R^2$ - value of the model with respect to  $\alpha$  when  $\lambda$  was set to give the minimum cross-validation mean squared error (MSE). Right: Cross-validation MSE with respect to  $\lambda$  when  $\alpha = 1$ .

The mean squared error (MSE) of the GA model was used to separate PE patients from women with normal pregnancies. Specifically, assuming a woman had estimated GA of  $\hat{y}_{k1}, \dots, \hat{y}_{km}$  for samples collected at the observed GA of  $y_{k1}, \dots, y_{km}$ , the MSE of the model for this woman is:

$$MSE = \frac{1}{m} \sum_{k=k1}^{km} (\hat{y}_k - y_k)^2 \quad (2)$$

where  $m$  is the number of samples. To account for the randomness of errors, only women having 2 or more samples collected during pregnancy (i.e.,  $m \geq 2$ ) were included for the calculations.
