# Supplementary material for: Changes in pregnancy-related serum biomarkers early in gestation are associated with later development of preeclampsia
Source: PubMed Central journal article supplement (PMC7053753; doi:10.1371/journal.pone.0230000), 2020-03-03
Supplement: pone.0230000.s004.pdf [file pone.0230000.s004.pdf]

**S1 Table.**

|                  | 5–9 weeks' | 10–14 weeks' | 15–25 weeks' | 26–33 weeks' | 27–38 weeks' |
|------------------|------------|--------------|--------------|--------------|--------------|
|                  | GA         | GA           | GA           | GA           | GA           |
| <b>LEP</b>       | 15080      | 8858         | 12270        | 4935         | 21136        |
| <b>CSHL1</b>     | 108141     | 161665       | -37460       | -35820       | 1964         |
| <b>ELA</b>       | -69        | 292          | 215          | 10           | 121          |
| <b>Activin A</b> | -138       | 84           | 492          | 1175         | 946          |
| <b>sFlt-1</b>    | -645       | -212         | 504          | 2831         | 2983         |
| <b>PlGF</b>      | 20         | 0.1          | -83          | -337         | -686         |
